# Supplementary material for: A measurement and modelling investigation of the indoor air chemistry following cooking activities
Source: Royal Society of Chemistry journal article supplement (doi:10.1039/d3em00167a), 2023-01-01
Supplement: d3em00167a1.pdf [file d3em00167a1.pdf]

## SUPPLEMENTARY INFORMATION: A measurement and modelling investigation of the indoor air chemistry following cooking activities

Helen L. Davies<sup>1</sup>, Catherine O’Leary<sup>2</sup>, Terry Dillon<sup>2</sup>, David R. Shaw<sup>1</sup>, Marvin Shaw<sup>2</sup>, Archit Mehra<sup>3</sup>, Gavin Phillips<sup>3,‡</sup>, and Nicola Carslaw<sup>1,\*</sup>

<sup>1</sup>Department of Environment and Geography, University of York, Heslington, York, UK.

<sup>2</sup>Wolfson Atmospheric Chemistry Laboratories, Department of Chemistry, University of York, Heslington, York, UK.

<sup>3</sup>Department of Physical, Mathematical and Engineering Sciences, University of Chester, Chester, UK.

\*Corresponding Email: nicola.carslaw@york.ac.uk

‡Present address: Faculty of Science and Engineering, Maastricht University, Maastricht, The Netherlands.

### 1 DOMESTIC Container Layout

Figure S1 shows the layout of the DOMESTIC container where cooking experiments took place.

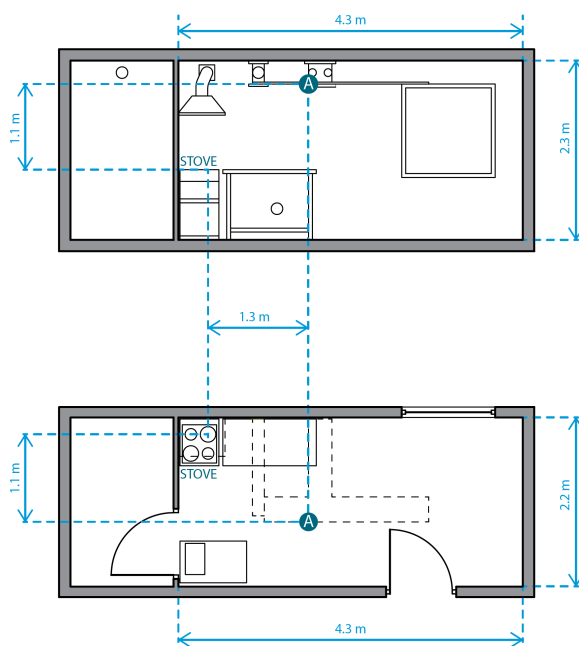

**Figure S1:** Section and plan views of the DOMESTIC facility. The SIFT-MS inlet position is marked by A. The door to the bathroom on the left side of the diagram was kept shut during experiments.

## 2 SIFT-MS

The VOCs measured using each reagent ion in the SIFT-MS method are shown in Table S1, along with the species molecular weights, product ions, rate coefficients and branching ratios. Whether or not detection of a species on that particular reagent ion was used for quantification is also shown in the ‘Included in Analysis’ column. Table S2 shows the species that were measured by the SIFT during the DOMESTIC campaign, their limits of detection (LOD), and whether or not the species are calibrated against a gas standard.

**Table S1:** The compounds measured by the SIFT-MS and their corresponding reagent ions, molecular masses (MM) and product ion chemical formulae

| Reagent Ion          | Compound              | MM<br>(g mol <sup>-1</sup> )                                    | Product Ion                                                                        | Reaction Rate<br>(cm <sup>3</sup> molecules <sup>-1</sup> s <sup>-1</sup> )  | Branching ratio (%)    | Included in Analysis? |   |
|----------------------|-----------------------|-----------------------------------------------------------------|------------------------------------------------------------------------------------|------------------------------------------------------------------------------|------------------------|-----------------------|---|
| H3O+                 | Formaldehyde          | 31                                                              | CH <sub>3</sub> O <sup>+</sup>                                                     | 3.4 × 10 <sup>-9</sup>                                                       | 100                    | ✓                     |   |
|                      |                       | 49                                                              | H <sub>2</sub> HCO · H <sup>+</sup> · H <sub>2</sub> O                             | 3.4 × 10 <sup>-9</sup>                                                       |                        |                       |   |
|                      | Methanol              | 33                                                              | CH <sub>5</sub> O <sup>+</sup>                                                     | 2.7 × 10 <sup>-9</sup>                                                       | 100                    | ✓                     |   |
|                      |                       | Acetonitrile                                                    | 42                                                                                 | CH <sub>3</sub> CN · H <sup>+</sup>                                          | 5.1 × 10 <sup>-9</sup> | 100                   | ✓ |
|                      | 60                    |                                                                 | CH <sub>3</sub> CN · H <sup>+</sup> · H <sub>2</sub> O                             | 5.1 × 10 <sup>-9</sup>                                                       |                        |                       |   |
|                      | Acetaldehyde          | 45                                                              | C <sub>2</sub> H <sub>4</sub> O · H <sup>+</sup>                                   | 3.7 × 10 <sup>-9</sup>                                                       | 100                    | ✓                     |   |
|                      | Ethanol               | 47                                                              | C <sub>2</sub> H <sub>7</sub> O <sup>+</sup>                                       | 2.7 × 10 <sup>-9</sup>                                                       | 100                    | ✓                     |   |
|                      | Nitrous Acid          | 48                                                              | H <sub>2</sub> NO <sub>2</sub> <sup>+</sup>                                        | 2.7 × 10 <sup>-9</sup>                                                       | 33                     |                       |   |
|                      | Propanal <sup>a</sup> | 59                                                              | C <sub>3</sub> H <sub>7</sub> O <sup>+</sup>                                       | 3.6 × 10 <sup>-9</sup>                                                       | 100                    | ✓                     |   |
|                      | Acrylamide            | 72                                                              |                                                                                    | C <sub>2</sub> H <sub>3</sub> NH <sub>2</sub> CO · H <sup>+</sup>            | 2.1 × 10 <sup>-9</sup> | 100                   | ✓ |
|                      |                       |                                                                 |                                                                                    |                                                                              |                        |                       |   |
|                      | N-methylpyrrole       | 82                                                              |                                                                                    | C <sub>5</sub> H <sub>7</sub> N · H <sup>+</sup>                             | 3.0 × 10 <sup>-9</sup> | 100                   | ✓ |
|                      |                       |                                                                 |                                                                                    |                                                                              |                        |                       |   |
|                      | Hexanal               | 101                                                             |                                                                                    | C <sub>6</sub> H <sub>13</sub> O <sup>+</sup>                                | 3.7 × 10 <sup>-9</sup> | 95                    | ✓ |
|                      |                       |                                                                 | 119                                                                                | C <sub>6</sub> H <sub>13</sub> O <sup>+</sup> · 2 H <sub>2</sub> O           | 3.7 × 10 <sup>-9</sup> |                       |   |
|                      | 2,5-dimethylpyrazine  | 109                                                             | C <sub>6</sub> N <sub>2</sub> H <sub>8</sub> · H <sup>+</sup>                      | 3.4 × 10 <sup>-9</sup>                                                       | 100                    |                       |   |
|                      | Heptanal              | 115                                                             | C <sub>7</sub> H <sub>15</sub> O <sup>+</sup>                                      | 4.7 × 10 <sup>-9</sup>                                                       | 80                     | ✓                     |   |
|                      | Benzoic Acid          | 123                                                             | C <sub>7</sub> H <sub>6</sub> O <sub>2</sub> · H <sup>+</sup>                      | 3.0 × 10 <sup>-9</sup>                                                       | 100                    | ✓                     |   |
|                      | Maltol                | 127                                                             |                                                                                    | C <sub>6</sub> H <sub>6</sub> O <sub>3</sub> · H <sup>+</sup>                | 4.0 × 10 <sup>-9</sup> | 100                   | ✓ |
|                      |                       |                                                                 | 145                                                                                | C <sub>6</sub> H <sub>6</sub> O <sub>3</sub> · H <sub>3</sub> O <sup>+</sup> | 4.0 × 10 <sup>-9</sup> |                       |   |
|                      | Octanal               | 129                                                             | C <sub>8</sub> H <sub>17</sub> O <sup>+</sup>                                      | 3.8 × 10 <sup>-9</sup>                                                       | 85                     | ✓                     |   |
|                      | Total Monoterpenes    | 137                                                             |                                                                                    | C <sub>10</sub> H <sub>17</sub> <sup>+</sup>                                 | 2.6 × 10 <sup>-9</sup> | 30                    |   |
|                      |                       |                                                                 | 155                                                                                | C <sub>10</sub> H <sub>17</sub> · H <sub>2</sub> O <sup>+</sup>              | 2.6 × 10 <sup>-9</sup> |                       |   |
|                      | Nonanal               | 143                                                             |                                                                                    | C <sub>9</sub> H <sub>19</sub> O <sup>+</sup>                                | 2.5 × 10 <sup>-9</sup> | 86                    | ✓ |
|                      |                       |                                                                 | 153                                                                                | C <sub>10</sub> H <sub>17</sub> O <sup>+</sup>                               | 4.9 × 10 <sup>-9</sup> |                       |   |
|                      | 2,4-decadienal        | 171                                                             |                                                                                    | C <sub>10</sub> H <sub>17</sub> <sup>+</sup> · H <sub>2</sub> O              | 4.9 × 10 <sup>-9</sup> |                       |   |
|                      |                       |                                                                 |                                                                                    |                                                                              |                        |                       |   |
| Decane               | 161                   | H <sub>3</sub> O <sup>+</sup> · C <sub>10</sub> H <sub>22</sub> | 1.6 × 10 <sup>-9</sup>                                                             | 100                                                                          | ✓                      |                       |   |
| Methyl Cinnamate     | 163                   |                                                                 | C <sub>10</sub> H <sub>10</sub> O <sub>2</sub> · H <sup>+</sup>                    | 3.4 × 10 <sup>-9</sup>                                                       | 100                    | ✓                     |   |
|                      |                       | 181                                                             | C <sub>10</sub> H <sub>10</sub> O <sub>2</sub> · H <sup>+</sup> · H <sub>2</sub> O | 3.4 × 10 <sup>-9</sup>                                                       |                        |                       |   |
| Total Sesquiterpenes | 205                   | C <sub>15</sub> H <sub>25</sub> <sup>+</sup>                    | 2.5 × 10 <sup>-9</sup>                                                             | 64                                                                           | ✓                      |                       |   |
| NO+                  | Acrolein              | 55                                                              | C <sub>3</sub> H <sub>3</sub> O <sup>+</sup>                                       | 1.6 × 10 <sup>-9</sup>                                                       | 60                     |                       |   |
|                      | 1-propanol            | 59                                                              | C <sub>3</sub> H <sub>7</sub> O <sup>+</sup>                                       | 6.3 × 10 <sup>-10</sup>                                                      | 59                     | ✓                     |   |
|                      |                       | 77                                                              | C <sub>3</sub> H <sub>7</sub> O · H <sub>2</sub> O <sup>+</sup>                    | 6.3 × 10 <sup>-10</sup>                                                      |                        |                       |   |
|                      | Furan/Isoprene        | 68                                                              | C <sub>4</sub> H <sub>4</sub> O <sup>+</sup>                                       | 1.7 × 10 <sup>-9</sup>                                                       | 100                    | ✓                     |   |
|                      | Benzene               | 78                                                              | C <sub>6</sub> H <sub>6</sub> <sup>+</sup>                                         | 1.5 × 10 <sup>-9</sup>                                                       | 55                     | ✓                     |   |
|                      | Acrolein              | 86                                                              | C <sub>3</sub> H <sub>4</sub> O · NO <sup>+</sup>                                  | 2.7 × 10 <sup>-9</sup>                                                       | 40                     | ✓                     |   |
|                      | Acetone <sup>b</sup>  | 88                                                              | NO <sup>+</sup> · C <sub>3</sub> H <sub>6</sub> O                                  | 1.0 × 10 <sup>-9</sup>                                                       | 100                    | ✓                     |   |
|                      | Acetic Acid           | 90                                                              | NO <sup>+</sup> · CH <sub>3</sub> COOH                                             | 9.0 × 10 <sup>-10</sup>                                                      | 100                    | ✓                     |   |
|                      | Toluene               | 92                                                              | C <sub>7</sub> H <sub>8</sub> <sup>+</sup>                                         | 2.2 × 10 <sup>-9</sup>                                                       | 100                    | ✓                     |   |

|     |                                      |     |                                                         |                       |     |   |
|-----|--------------------------------------|-----|---------------------------------------------------------|-----------------------|-----|---|
|     | Dimethyl Disulfide                   | 94  | $(\text{CH}_3)_2\text{S}_2^+$                           | $2.4 \times 10^{-9}$  | 100 | ✓ |
|     | Hexanal                              | 99  | $\text{C}_6\text{H}_{11}\text{O}^+$                     | $2.5 \times 10^{-9}$  | 100 |   |
|     | Benzoic Acid                         | 105 | $\text{C}_7\text{H}_5\text{O}^+$                        | $3.0 \times 10^{-9}$  | 60  |   |
|     | m-Xylene (C2-alkyl benzenes)         | 106 | $\text{C}_8\text{H}_{10}^+$                             | $2.0 \times 10^{-9}$  | 100 | ✓ |
|     | 2-heptenal                           | 111 | $\text{C}_7\text{H}_{11}\text{O}^+$                     | $3.9 \times 10^{-9}$  | 85  | ✓ |
|     | Trimethylbenzene (C3-alkyl benzenes) | 120 | $\text{C}_9\text{H}_{12}^+$                             | $1.9 \times 10^{-9}$  | 100 | ✓ |
|     | Maltol                               | 126 | $\text{C}_6\text{H}_6\text{O}_3^+$                      | $2.5 \times 10^{-9}$  | 100 |   |
|     | Cinnamaldehyde                       | 132 | $\text{C}_9\text{H}_8\text{O}^+$                        | $2.0 \times 10^{-9}$  | 100 |   |
|     | Total Monoterpenes                   | 136 | $\text{C}_{10}\text{H}_{16}^+$                          | $2.2 \times 10^{-9}$  | 75  | ✓ |
|     | Diallyl Disulfide                    | 146 | $(\text{C}_3\text{H}_5)_2\text{S}_2^+$                  | $2.4 \times 10^{-9}$  | 100 | ✓ |
|     | 2,4-decadienal                       | 151 | $\text{C}_{10}\text{H}_{15}\text{O}^+$                  | $4.2 \times 10^{-9}$  | 80  | ✓ |
|     | Eucalyptol                           | 154 | $\text{C}_{10}\text{H}_{18}\text{O}^+$                  | $2.4 \times 10^{-9}$  | 94  | ✓ |
|     | Undecane                             | 155 | $\text{C}_{11}\text{H}_{23}^+$                          | $3.8 \times 10^{-9}$  | 84  | ✓ |
|     | Methyl Cinnamate                     | 162 | $\text{C}_{10}\text{H}_{10}\text{O}_2^+$                | $1.4 \times 10^{-9}$  | 100 |   |
|     |                                      | 181 | $\text{C}_{10}\text{H}_{12}\text{O}_2 \cdot \text{H}^+$ | $1.4 \times 10^{-9}$  |     |   |
|     | Eugenol                              | 164 | $\text{C}_{10}\text{H}_{12}\text{O}_2^+$                | $2.4 \times 10^{-9}$  | 100 | ✓ |
|     | 2-ethyl-2,5,-dimethylpyrazine        | 166 | $\text{C}_8\text{H}_{12}\text{N}_2 \cdot \text{NO}^+$   | $3.0 \times 10^{-9}$  | 15  | ✓ |
|     | Cinnamyl Acetate                     | 176 | $\text{C}_{11}\text{H}_{12}\text{O}_2^+$                | $3.0 \times 10^{-9}$  | 100 | ✓ |
|     | Total Sesquiterpenes                 | 204 | $\text{C}_{15}\text{H}_{24}^+$                          | $2.0 \times 10^{-9}$  | 38  |   |
| O2+ | Nitrogen Dioxide                     | 46  | $\text{NO}_2^+$                                         | $6.2 \times 10^{-10}$ | 100 | ✓ |
|     | Furan/Isoprene                       | 68  | $\text{C}_4\text{H}_4\text{O}^+$                        | $1.6 \times 10^{-9}$  | 100 |   |
|     | Octane                               | 85  | $\text{C}_6\text{H}_{13}^+$                             | $1.6 \times 10^{-9}$  | 50  | ✓ |
|     | Nonane                               | 99  | $\text{C}_7\text{H}_{15}^+$                             | $2.1 \times 10^{-9}$  | 10  | ✓ |
|     | 2,5-dimethylpyrazine                 | 108 | $\text{C}_6\text{N}_2\text{H}_8^+$                      | $2.7 \times 10^{-9}$  | 100 | ✓ |
|     | Dimethyl Trisulfide                  | 111 | $\text{CH}_3\text{S}_3^+$                               | $2.2 \times 10^{-9}$  | 15  | ✓ |
|     | Maltol                               | 126 | $\text{C}_6\text{H}_6\text{O}_3^+$                      | $2.5 \times 10^{-9}$  | 100 |   |
|     | Cinnamaldehyde                       | 132 | $\text{C}_9\text{H}_8\text{O}^+$                        | $2.0 \times 10^{-9}$  | 100 | ✓ |
|     | Cinnamyl Acetate                     | 134 | $\text{C}_9\text{H}_{10}\text{O}^+$                     | $1.5 \times 10^{-9}$  | 100 |   |
|     | Undecane                             | 156 | $\text{C}_{11}\text{H}_{24}^+$                          | $3.2 \times 10^{-9}$  | 31  | ✓ |
|     | Eugenol                              | 164 | $\text{C}_{10}\text{H}_{12}\text{O}_2^+$                | $1.9 \times 10^{-9}$  | 100 |   |

<sup>a</sup>Propanal calculated by subtracting the acetone measured at  $\text{NO}^+$  mass 88 from the combined propanal and acetone measured at  $\text{H}_3\text{O}^+$  mass 59. <sup>b</sup>Acetone calculated by subtracting the limonene measured at  $\text{NO}^+$  mass 136 from the combined acetone and monoterpenes measured at  $\text{NO}^+$  mass 88.

**Table S2:** Species identified by the SIFT-MS, their limits of detection, and whether or not their concentrations were calibrated against a gas standard

| Species                 | Limit of Detection (ppb) | Calibrated?    |
|-------------------------|--------------------------|----------------|
| Acetaldehyde            | 1.80                     |                |
| Propanal                | 1.10                     |                |
| Acrolein                | 0.45                     |                |
| Hexanal                 | 0.75                     |                |
| 2-Heptenal              | 0.12                     |                |
| Heptanal                | 0.48                     |                |
| Octanal                 | 0.24                     |                |
| Nonanal                 | 0.30                     |                |
| Octane                  | 1.20                     | ✓              |
| Nonane                  | 4.40                     | ✓              |
| Decane                  | 0.26                     |                |
| Undecane                | 0.21                     |                |
| Total monoterpenes      | 0.20                     | ✓ <sup>a</sup> |
| Total sesquiterpenes    | 0.92                     |                |
| Methanol                | 1.20                     | ✓              |
| Ethanol                 | 2.20                     | ✓              |
| 1-Propanol              | 0.89                     |                |
| Benzene                 | 0.24                     | ✓              |
| Total C2 alkyl benzenes | 0.20                     | ✓ <sup>b</sup> |
| Total C3 alkyl benzenes | 0.33                     | ✓ <sup>c</sup> |
| Benzoic acid            | 0.22                     |                |
| Dimethyl trisulfide     | 1.90                     |                |
| Diallyl disulfide       | 0.12                     |                |
| Dimethyl disulfide      | 0.19                     |                |
| Acetonitrile            | 0.32                     | ✓              |
| Acetone                 | 0.52                     | ✓              |
| Nitrogen dioxide        | 3.80                     |                |
| Acetic acid             | 1.20                     |                |
| Maltol                  | 0.18                     |                |
| Eucalyptol              | 0.12                     |                |
| Furan + isoprene        | 0.11                     | ✓ <sup>d</sup> |
| N-methylpyrrole         | 0.07                     |                |
| Acrylamide              | 0.19                     |                |
| 2,4-Decadienal          | 0.06                     |                |

<sup>a</sup>Limonene used as calibration gas. <sup>b</sup>m-xylene used as calibration gas. <sup>c</sup>1,2,4-trimethylbenzene used as calibration gas. <sup>d</sup>Isoprene used as calibration gas.

### 3 SIFT Uncertainties

The uncertainties for uncalibrated species measured by the SIFT is taken to be  $\pm 35\%$ , as recommended in Syft training resources [1], and [2]. However, for calibrated species, the uncertainties in the measurements are generally smaller, and are attributable to the calibration process.

For calibration, known concentrations of calibrant species are measured by the SIFT, and the relationship between the calibrant concentration and the measured concentration is assessed using linear regression, as follows:

$$C_{c,m} = \nabla C_m + y_i \tag{1}$$

where  $C_{c,m}$  is the calibrated measured concentration,  $C_m$  is the raw measured concentration,  $\nabla$  is the gradient of the fitted line, which equates to the calibration coefficient, and  $y_i$  is the y-intercept which corresponds to concentration-independent shift in the measured data such that the measurement is 0 when no calibrant is being input.

The resulting overall uncertainty is then calculated by combining the standard errors of  $\nabla$  and  $y_i$  from the linear fit, and the uncertainty in the calibration equipment (gas standard concentration and the gas blenders). Therefore, total uncertainty is

$$U_s = \left[ C_{c,m} \times \sqrt{\left(\frac{SE_{\nabla}}{\nabla}\right)^2 + RSE_{blend}^2 + RSE_{gas}^2} \right] + SE_{y_i} \quad (2)$$

Where  $C_{c,m}$  is the calibrated measured concentration,  $SE_{\nabla}$  is the standard error of  $\nabla$ ,  $RSE_{blend}$  is the relative uncertainty of the gas blenders ( $\pm 2\%$ ),  $RSE_{gas}$  is the relative uncertainty of the gas standard ( $\pm 5\%$ ), and  $SE_{y_i}$  is the standard error of the y-intercept. The relative errors are added in quadrature and multiplied by the measured concentration then summed with  $SE_{y_i}$  to give a total uncertainty in ppb. The absolute error on any measured point is, therefore,  $C_{c,m} \pm U_s$ .

Values for the calibration factors, y-intercepts and their associated errors for each of the calibrated species are given in Table S3.

**Table S3:** Calibrated SIFT species error analysis values

| Species                              | $\nabla$ ( $\pm SE_{\nabla}$ ) | $y_i$ ( $\pm SE_{y_i}$ ) |
|--------------------------------------|--------------------------------|--------------------------|
| Octane                               | 0.7513 ( $\pm 0.0094$ )        | -0.8698 ( $\pm 0.0828$ ) |
| Nonane                               | 1.0749 ( $\pm 0.0494$ )        | -2.4658 ( $\pm 0.3470$ ) |
| Total monoterpenes                   | 5.3003 ( $\pm 0.0752$ )        | 0.2873 ( $\pm 0.1522$ )  |
| Methanol                             | 1.3385 ( $\pm 0.0239$ )        | -1.5906 ( $\pm 0.1275$ ) |
| Ethanol                              | 1.5542 ( $\pm 0.0474$ )        | -8.4624 ( $\pm 0.4091$ ) |
| Benzene                              | 1.1375 ( $\pm 0.0078$ )        | -0.1230 ( $\pm 0.0413$ ) |
| Total C2 alkyl benzenes <sup>a</sup> | 1.4639 ( $\pm 0.0150$ )        | 0.0824 ( $\pm 0.0603$ )  |
| Total C3 alkyl benzenes              | 1.6809 ( $\pm 0.0336$ )        | 0.3394 ( $\pm 0.1106$ )  |
| Acetonitrile                         | 1.1942 ( $\pm 0.0093$ )        | -0.3278 ( $\pm 0.0482$ ) |
| Acetone                              | 2.3656 ( $\pm 0.0373$ )        | -0.6599 ( $\pm 0.1008$ ) |
| Furan + isoprene                     | 2.2139 ( $\pm 0.0160$ )        | 0.0079 ( $\pm 0.0429$ )  |

Errors are calculated from fits using calibration data from 4 days when cooking experiments were carried out. <sup>a</sup>Errors for total C2 alkyl benzenes were calculated using only 3 calibrations, as a C2 alkyl benzene calibration was not performed on one of the cooking days.

## 4 Air Change Rate

The air change rate in the DOMESTIC facility was measured during the campaign using acetonitrile tracer releases. An example fitting of an acetonitrile decay is shown in Figure S2 for one of the cooking-only days on the campaign. The background acetonitrile concentration was subtracted from the calibrated acetonitrile concentration ( $C_t - C_b$ ), then the natural log was taken on the resulting concentration. After the release, the initial 10 minute mixing period was discounted, then a decay curve was fitted to the next 2 hour period, shown by the green shaded area in Figure S2.

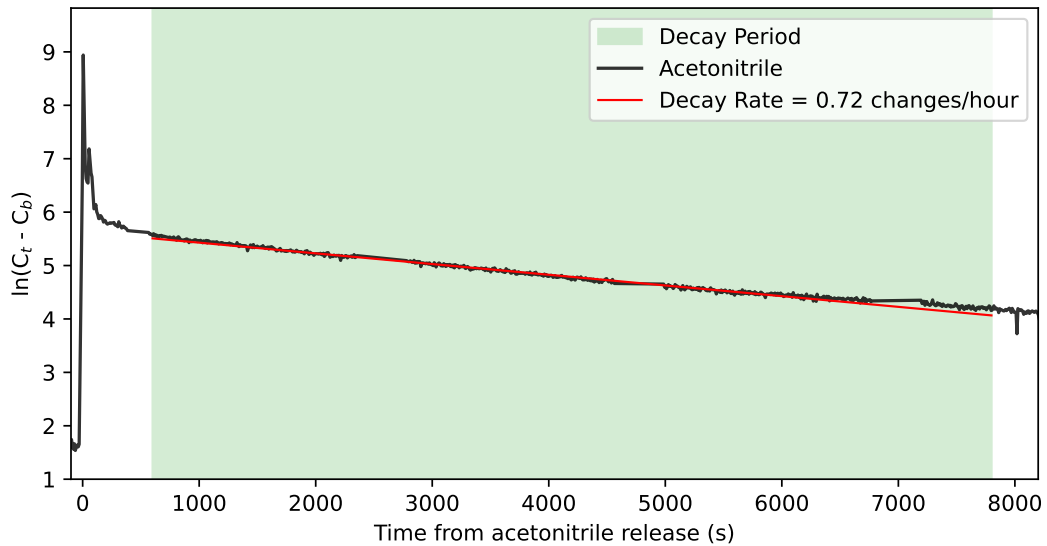

**Figure S2:** Fitting a log-linear decay curve to acetonitrile concentration data to determine air change rate (ACR) during the DOMESTIC campaign.

## 5 Experimental Reproducibility

Figure S3 shows the mixing ratios of three representative species that are emitted during the stir-fry cooking process, measured using SIFT-MS. The data from cooking-only days are shown by the red and orange markers, and data from layered days are shown by the light and dark blue markers. The green shaded area signifies the cooking period from  $t_0$  to the point when the pan was removed from the kitchen. In general, the data are very reproducible, with peaks appearing at the same time points in the cooking process for each of the days, even though the mixing ratios vary between repeats.

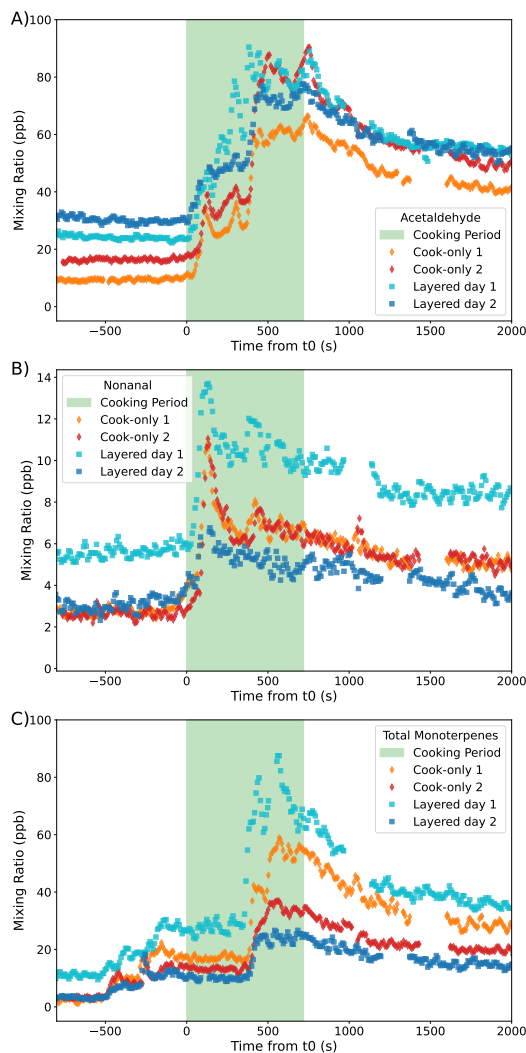

**Figure S3:** Mixing ratios of acetaldehyde (A), nonanal (B) and total monoterpenes (C) measured by SIFT-MS to assess the reproducibility of stir-fry emissions on multiple days. ‘Cook-only’ refers to days when only the stir-fry was cooked and the room was undisturbed for the rest of the day. ‘Layered day’ refers to days when the stir-fry was cooked as part of a series of sequential cooking and cleaning activities in the DOMESTIC container.

## 6 Obtaining Experimental Emission Rates

Emission rates are fitted manually to the SIFT-MS data, whereby the concentrations at the start and end of an emission are chosen, and the gradient calculated and taken to be the emission rate. Examples of fitted emissions are shown in Figure S4 for three representative VOCs emitted by the average stir-fry from the two cooking-only days, as described in the manuscript.

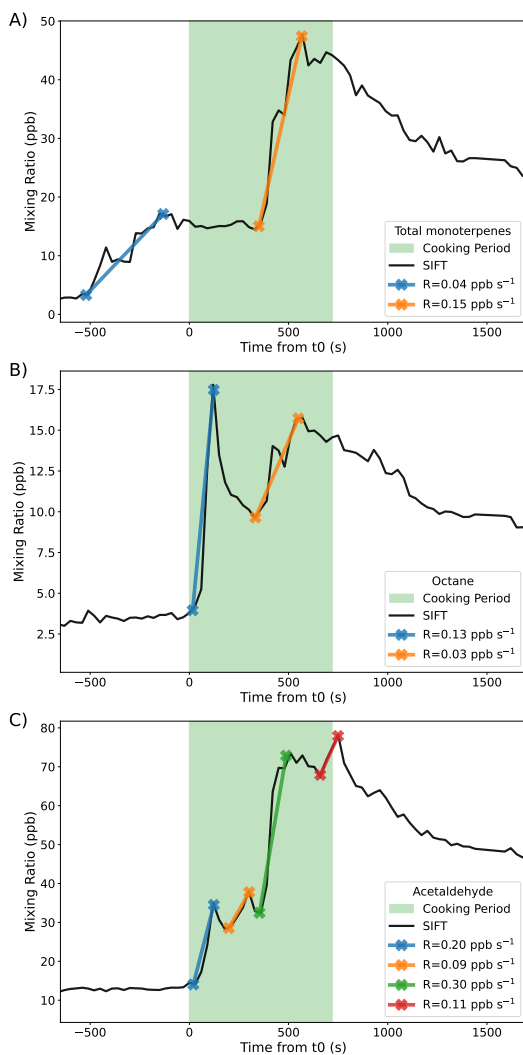

**Figure S4:** Concentrations of total monoterpenes (A), octane (B) and acetaldehyde (C) for the average stir-fry (average SIFT-MS data for the two cooking-only days). Emission rates (coloured lines) are determined from the gradient of peaks and are shown in the legend. This protocol was used for the other species emitted, but not shown here. The shaded green area shows the time period where cooking takes place.



## 7 Simulated Cooking Emissions

The species included as emissions are shown in Figure S5, which shows the changes in concentration of individual VOCs, and the total concentrations of the different chemical groups. The seven aldehydes measured by the SIFT-MS that increase in concentration during cooking are shown in two groups for clarity. The groups are  $\leq C3$  aldehydes (acetaldehyde, propanal and acrolein) and  $>C3$  aldehydes (hexanal, heptanal, octanal and nonanal). After the cooking period (shown by the purple shaded area), each of the VOCs decay away significantly in the 3 hour period post-cooking (green shaded area). The combination of these experimentally-derived emissions and the average kitchen properties constitutes the base case cooking scenario.

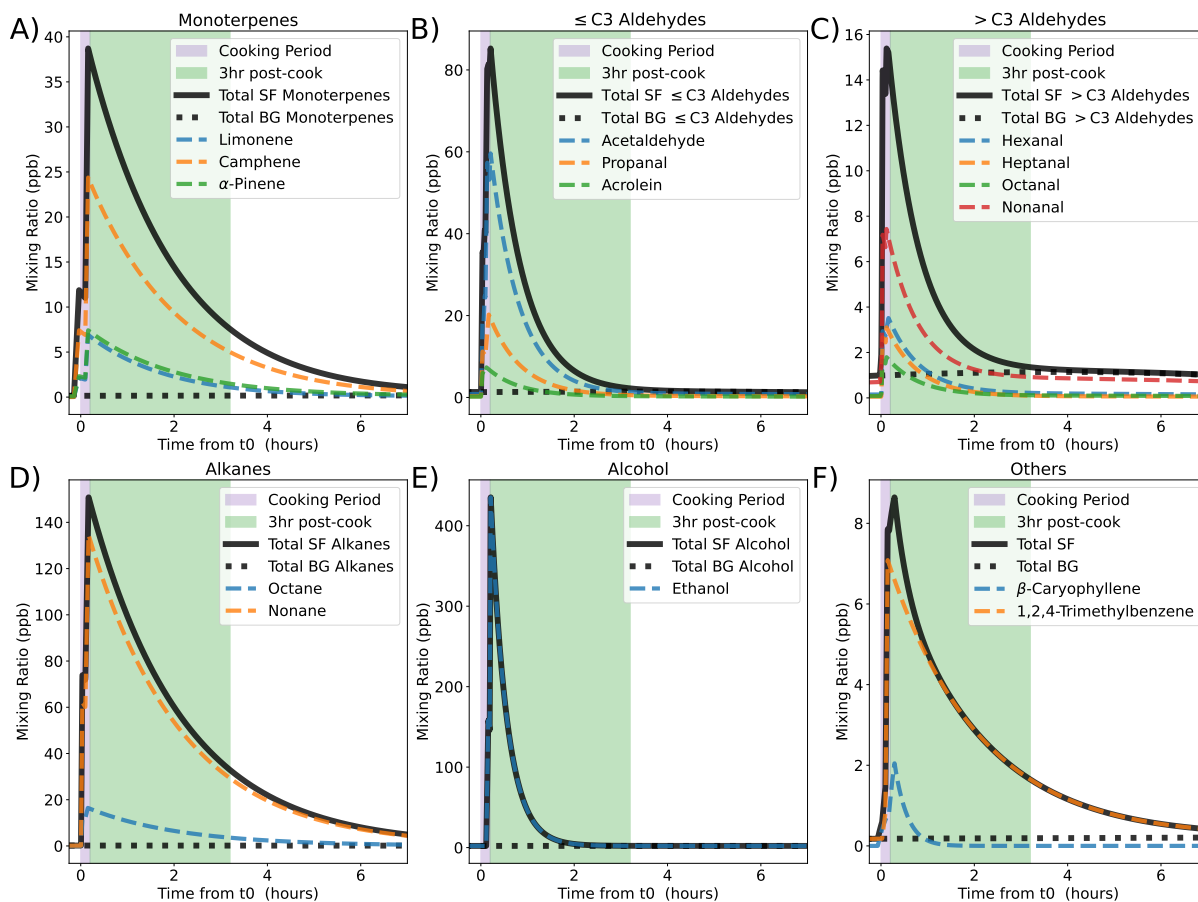

**Figure S5:** Mixing ratios versus time for the species used to simulate the cooking of an average stir-fry. Each plot shows a different group of species, where the black solid line shows the total mixing ratio of the group during cooking (total SF), and the black dotted line shows the total background mixing ratio when no cooking takes place (total BG). The coloured dashed lines show the individual species in each of the groups.  $\leq C3$  and  $>C3$  aldehydes are shown separately for clarity.

## 8 Methanol Emissions

As discussed in the paper, methanol concentrations were extremely high in the DOMESTIC facility during the campaign, likely due to off-gassing from the relatively new materials used in the container. Therefore, methanol was excluded from the simulations. This was acceptable as simulation tests where methanol emissions were included or not showed that the inclusion of methanol emissions made very little difference to the secondary chemistry, and the formation of secondary species.

The formation of various secondary products following cooking in the base case scenario (shown in Table 3, main article) when methanol emissions were included (Inc. CH<sub>3</sub>OH) or excluded (Exc. CH<sub>3</sub>OH) is shown in Figure S6. The small pink circles show the background mixing ratios when no cooking takes place, and the larger purple circles show the average species mixing ratios when cooking emissions are included.

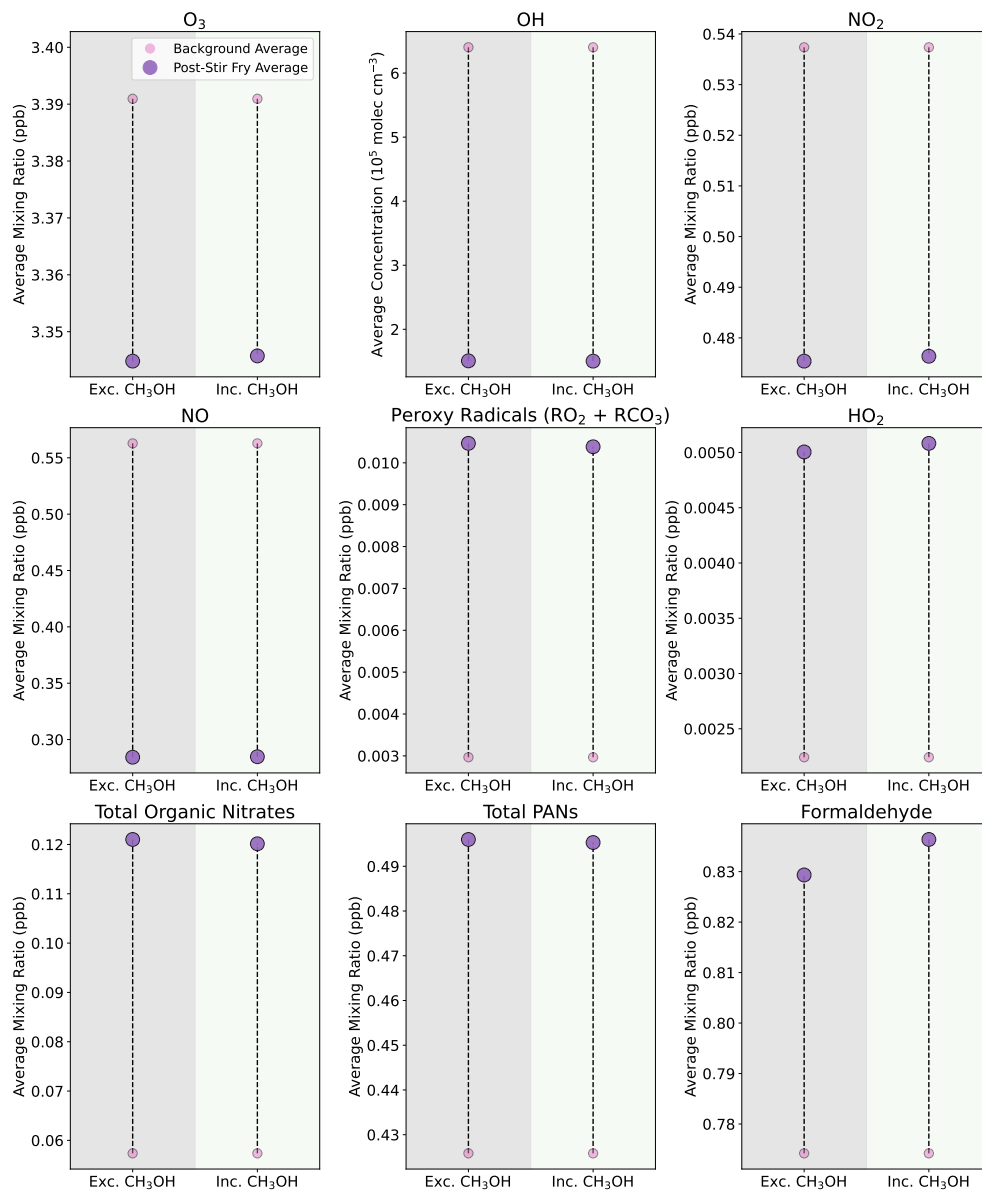

**Figure S6:** Effect of including or excluding methanol on the formation of secondary products. Smaller pink circles show the average background mixing ratio, and the larger purple circles show the average mixing ratio when a stir-fry is simulated. In both cases the average is calculated over a 3 hour period, starting 15 minutes before t<sub>0</sub>.

## 9 Relative Effects of Cooking on Primary and Secondary Species

To see the relative effect of cooking on species that are emitted directly or produced via secondary chemistry, the total concentration of the 15 modelled species emitted during cooking was calculated and normalised, so that the background concentration is 0, and the maximum total concentration is 1. A similar summing and normalising process was taken for the secondary species (total PANs, total organic nitrates and formaldehyde). The results are shown in Figure S7. Here it can be seen that the secondary species are relatively higher for longer than the directly emitted species. Following the initial peak, the primary emissions reach 50% and 10% of peak by  $\approx 35$  mins and 2 h 20 mins, respectively. In contrast, the secondaries reach 50% and 10% of post-cooking peak concentrations by  $\approx 1$  h 50 mins and 4 h 40 mins, respectively.

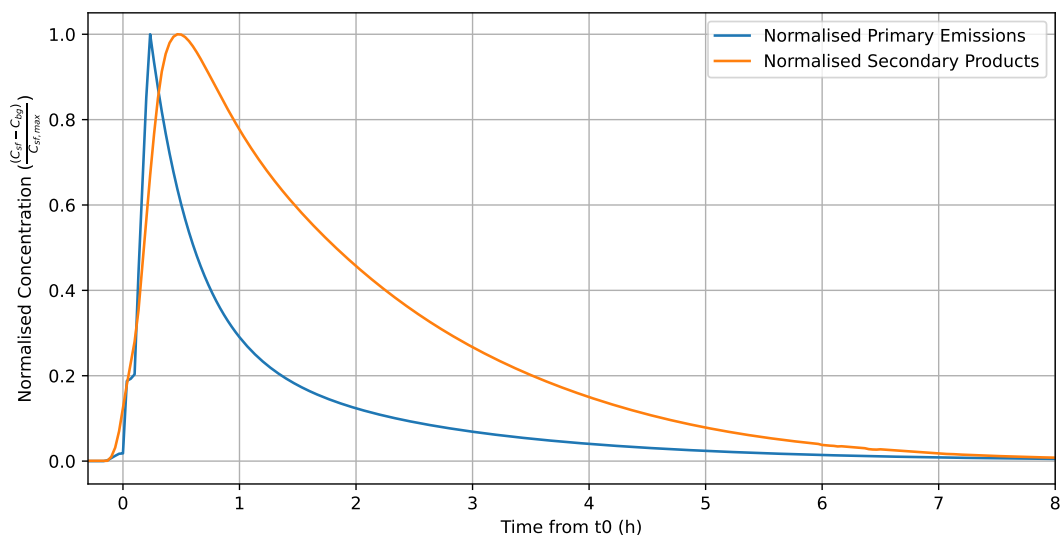

**Figure S7:** Normalised concentration of total directly emitted species (the 15 species modelled as cooking emissions) and total secondary products (total PANs, total organic nitrates and formaldehyde) over time, following  $t_0$ .

## 10 Outdoor Oxidant Concentrations

The outdoor mixing ratios of  $O_3$ , NO and  $NO_2$  used in the Base case and in the Polluted variation (Table 3, main text) are shown in Figure S8. Base case data is from the ‘GB0586A, suburban London, 0.070766 51.45258’ monitoring station (European Air Quality Database [3]), and the Polluted data is from measurements taken during a particularly polluted heatwave period in August 2003 in Milan [4].

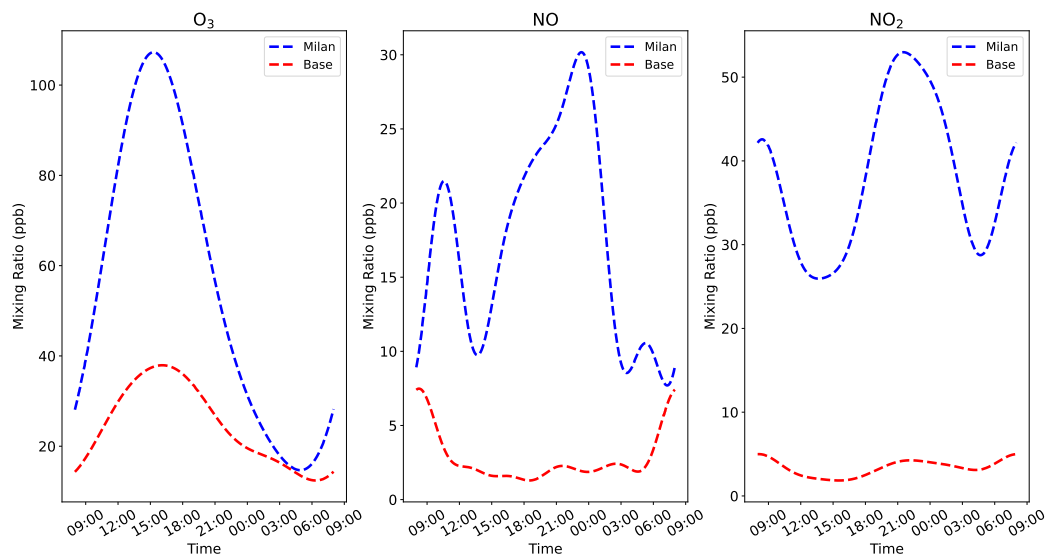

**Figure S8:** Mixing ratios of  $O_3$ , NO and  $NO_2$  used in the Base case the Polluted variation simulations. Base case data comes from the European Air Quality Database [3], and the Milan data is from Terry et al., 2014 [4].

## References

- [1] Syft Technologies. Quantitation: SIFT-MS Calibration Principles. *Syft Technologies Training Materials*, 2014.
- [2] Vaughan S. Langford, Ian Graves, and Murray J. McEwan. Rapid monitoring of volatile organic compounds: a comparison between gas chromatography/mass spectrometry and selected ion flow tube mass spectrometry. *Rapid Communications in Mass Spectrometry*, 28(1):10–18, 1 2014.
- [3] European Environmental Agency. European Air Quality Portal, 3. Date Accessed: 03-03-2023.
- [4] Andrew C. Terry, Nicola Carslaw, Mike Ashmore, Sani Dimitroulopoulou, and David C. Carslaw. Occupant exposure to indoor air pollutants in modern European offices: An integrated modelling approach. *Atmospheric Environment*, 82:9–16, 1 2014.
